# Supplementary material for: Aquaporin 1 suppresses apoptosis and affects prognosis in esophageal squamous cell carcinoma
Source: PubMed Central journal article supplement (PMC6057448; doi:10.18632/oncotarget.25722), 2018-07-06
Supplement: oncotarget-09-29957-s001.pdf [file oncotarget-09-29957-s001.pdf]

## Aquaporin 1 suppresses apoptosis and affects prognosis in esophageal squamous cell carcinoma

### SUPPLEMENTARY MATERIALS

**Supplementary Table 1A: The 20 genes that displayed the most up-regulated change in their expression levels in the AQP1 siRNA transfected TE5 cells**

| Symbol   | Gene Name                                                            | UniGene ID | Expr Fold Change |
|----------|----------------------------------------------------------------------|------------|------------------|
| TRPC7    | Transient receptor potential cation channel subfamily C member 7     | Hs.591263  | 176.947          |
| FCRL3    | Fc receptor like 3                                                   | Hs.292449  | 128.186          |
| GPC5     | Glypican 5                                                           | Hs.655675  | 100.456          |
| OR6C1    | Olfactory receptor family 6 subfamily C member 1                     | Hs.553763  | 83.208           |
| FGF1     | Fibroblast growth factor 1                                           | Hs.483635  | 79.713           |
| CBR1     | Carbonyl reductase 1                                                 | Hs.88778   | 79.535           |
| BOD1L2   | Biorientation of chromosomes in cell division 1 like 2               | Hs.127882  | 73.096           |
| THPO     | Thrombopoietin                                                       | Hs.1166    | 65.493           |
| IRF7     | Interferon regulatory factor 7                                       | Hs.166120  | 58.113           |
| MYOT     | Myotilin                                                             | Hs.84665   | 56.299           |
| GABBR1   | Gamma-aminobutyric acid type B receptor subunit 1                    | Hs.167017  | 51.456           |
| NXF5     | nuclear RNA export factor 5                                          | Hs.307077  | 46.64            |
| GSTM2    | Glutathione S-transferase mu 2                                       | Hs.279837  | 44.351           |
| NME9     | NME/NM23 family member 9                                             | Hs.660992  | 42.84            |
| MS4A4A   | Membrane spanning 4-domains A4A                                      | Hs.325960  | 42.187           |
| TMEM132B | Transmembrane protein 132B                                           | Hs.524838  | 42.053           |
| TAS2R13  | Taste 2 receptor member 13                                           | Hs.679407  | 39.57            |
| ETFBKMT  | Electron transfer flavoprotein beta subunit lysine methyltransferase | Hs.740628  | 38.782           |
| SERPINC1 | Serpin family C member 1                                             | Hs.75599   | 37.255           |
| ABCA8    | ATP binding cassette subfamily A member 8                            | Hs.58351   | 34.346           |

**Supplementary Table 1B: The 20 genes that displayed the most down-regulated change in their expression levels in the AQP1 siRNA transfected TE5 cells**

| <b>Symbol</b> | <b>Gene Name</b>                                                 | <b>UniGene ID</b> | <b>Expr Fold Change</b> |
|---------------|------------------------------------------------------------------|-------------------|-------------------------|
| PKD2L2        | Polycystin 2 like 2, transient receptor potential cation channel | Hs.716884         | -138.177                |
| FAM196B       | Family with sequence similarity 196 member B                     | Hs.721917         | -127.583                |
| MCMD2C2       | Minichromosome maintenance domain containing 2                   | Hs.677620         | -100.672                |
| CCR2          | C-C motif chemokine receptor 2                                   | Hs.132310         | -100.025                |
| ABC5          | ATP binding cassette subfamily B member 5                        | Hs.437006         | -94.806                 |
| BARHL2        | BarH like homeobox 2                                             | Hs.511794         | -93.257                 |
| MAGEE2        | MAGE family member E2                                            | Hs.404102         | -93.173                 |
| OSBPL6        | Oxysterol binding protein like 6                                 | Hs.451956         | -84.326                 |
| AATK          | Apoptosis associated tyrosine kinase                             | Hs.356869         | -82.49                  |
| TEX12         | Testis expressed 12                                              | Hs.318775         | -82.283                 |
| NDNF          | Neuron derived neurotrophic factor                               | Hs.514575         | -80.469                 |
| CSDC2         | Cold shock domain containing C2                                  | Hs.524039         | -76.808                 |
| PARP15        | Poly(ADP-ribose) polymerase family member 15                     | Hs.709520         | -73.573                 |
| PROK2         | Prokineticin 2                                                   | Hs.310893         | -73.559                 |
| CPO           | Carboxypeptidase O                                               | Hs.120250         | -72.393                 |
| CCDC127       | Coiled-coil domain containing 127                                | Hs.528665         | -71.182                 |
| TTL9          | Tubulin tyrosine ligase like 9                                   | Hs.684103         | -70.434                 |
| MEOX1         | Mesenchyme homeobox 1                                            | Hs.293833         | -69.256                 |
| COL13A1       | Collagen type XIII alpha 1 chain                                 | Hs.712915         | -66.308                 |
| OR10Q1        | Olfactory receptor family 10 subfamily Q                         | Hs.438            | -65.996                 |

**Supplementary Table 2: Top biological functions and canonical pathways of AQP1 according to an Ingenuity Pathway Analysis**

| <b>Top biological functions</b>                                              |                   |                            |
|------------------------------------------------------------------------------|-------------------|----------------------------|
| <b>Diseases and disorders</b>                                                |                   |                            |
| <b>Name</b>                                                                  | <b>P value</b>    | <b>Number of molecules</b> |
| Cancer                                                                       | 5.74E-04–9.13E-12 | 3515                       |
| Organismal injury and abnormalities                                          | 5.74E-04–9.13E-12 | 3594                       |
| Reproductive system disease                                                  | 5.74E-04–9.13E-12 | 1763                       |
| Inflammatory response                                                        | 5.55E-04–9.46E-12 | 797                        |
| Dermatological diseases and conditions                                       | 9.81E-05–5.55E-09 | 233                        |
| <b>Molecular and cellular functions</b>                                      |                   |                            |
| <b>Name</b>                                                                  | <b>P value</b>    | <b>Number of molecules</b> |
| Cellular movement                                                            | 5.20E-04–1.14E-09 | 817                        |
| Cellular development                                                         | 5.88E-04–4.14E-09 | 953                        |
| Cellular growth and proliferation                                            | 5.88E-04–4.14E-09 | 972                        |
| Cell morphology                                                              | 5.29E-04–1.42E-08 | 932                        |
| Cellular assembly and organization                                           | 2.55E-04–1.42E-08 | 551                        |
| <b>Top canonical pathways</b>                                                |                   |                            |
| <b>Name</b>                                                                  | <b>P value</b>    | <b>Number of molecules</b> |
| Dendritic cell maturation                                                    | 7.37E-07          | 37.8% (65/172)             |
| Communication between innate and adaptive immune cells                       | 2.37E-06          | 46.5% (33/71)              |
| Antigen presentation pathway                                                 | 3.07E-06          | 56.8% (21/37)              |
| Graft-versus-host disease signaling                                          | 2.41E-05          | 52.6% (20/38)              |
| Role of pattern recognition receptors in recognition of bacteria and viruses | 3.15E-05          | 37.2% (48/129)             |

**Supplementary Table 3: Backgrounds of 50 ESCC patients**

|                                  |      |     |
|----------------------------------|------|-----|
| <b>Sex</b>                       |      |     |
| Male                             | 42   | 84% |
| Female                           | 8    | 16% |
| <b>Age</b>                       |      |     |
| average                          | 62.4 |     |
| <65                              | 30   | 60% |
| ≥65                              | 20   | 40% |
| <b>Smoking (BI)</b>              |      |     |
| Non smoking                      | 10   | 20% |
| <1200                            | 14   | 28% |
| ≥1200                            | 16   | 32% |
| N.A                              | 10   | 20% |
| <b>Drinking (ethanol: g/day)</b> |      |     |
| Non drinking                     | 14   | 28% |
| Opportunity                      | 5    | 10% |
| drink                            | 17   | 34% |
| <60                              | 13   | 26% |
| ≥60                              | 1    | 2%  |
| N.A                              |      |     |
| <b>Histology type</b>            |      |     |
| Well/Moderate                    | 35   | 70% |
| Poor                             | 15   | 30% |
| <b>Location</b>                  |      |     |
| Ce-Ut                            | 5    | 10% |
| Mt                               | 24   | 48% |
| Lt-Ae                            | 21   | 42% |
| <b>Tumor size (mm)</b>           |      |     |
| <50                              | 31   | 62% |
| ≥50                              | 19   | 38% |
| <b>Lymphatic invasion</b>        |      |     |
| Negative                         | 22   | 44% |
| Positive                         | 28   | 56% |
| <b>Venous invasion</b>           |      |     |
| Negative                         | 26   | 52% |
| Positive                         | 24   | 48% |
| <b>pT</b>                        |      |     |
| pT1                              | 19   | 38% |
| pT2-4                            | 31   | 62% |
| <b>pN</b>                        |      |     |
| pN0                              | 19   | 38% |
| pN1-3                            | 31   | 62% |
| <b>pStage</b>                    |      |     |
| 1                                | 9    | 18% |
| 2                                | 25   | 50% |
| 3                                | 13   | 26% |
| 4                                | 3    | 6%  |
| <b>Postoperative therapy</b>     |      |     |
| Chemotherapy                     | 31   | 62% |
| Radiation                        | 11   | 22% |
| <b>Reccurrence</b>               |      |     |
| Positive                         | 20   | 40% |
| Negative                         | 30   | 60% |

BI:Brinkmann index

pT: pathological T stage, pN: pathological N stage

\*  $p < 0.05$ : Fisher's exact test.

**Supplementary Table 4: 5-year overall survival rate with each cut-off values for cytoplasm and nuclear membrane respectively**

| Population | <i>Cytoplasm</i>             |                 |                | <i>Nuclear membrane</i>      |                 |                |
|------------|------------------------------|-----------------|----------------|------------------------------|-----------------|----------------|
|            | 5-year overall survival rate |                 | <i>P</i> value | 5-year overall survival rate |                 | <i>P</i> value |
|            | Low group                    | High group      |                | Low group                    | High group      |                |
| 10         | 81.2%<br>(n=16)              | 62.8%<br>(n=34) | 0.235          | 62.7%<br>(n=19)              | 72.7%<br>(n=31) | 0.495          |
| 20         | 76.0%<br>(n=25)              | 61.5%<br>(n=25) | 0.305          | 63.6%<br>(n=28)              | 75.5%<br>(n=22) | 0.457          |
| 30         | 70.3%<br>(n=31)              | 66.5%<br>(n=19) | 0.996          | 61.0%<br>(n=35)              | 86.6%<br>(n=15) | 0.121          |
| 40         | 70.8%<br>(n=35)              | 65.0%<br>(n=15) | 0.919          | 63.6%<br>(n=40)              | 90.0%<br>(n=10) | 0.168          |

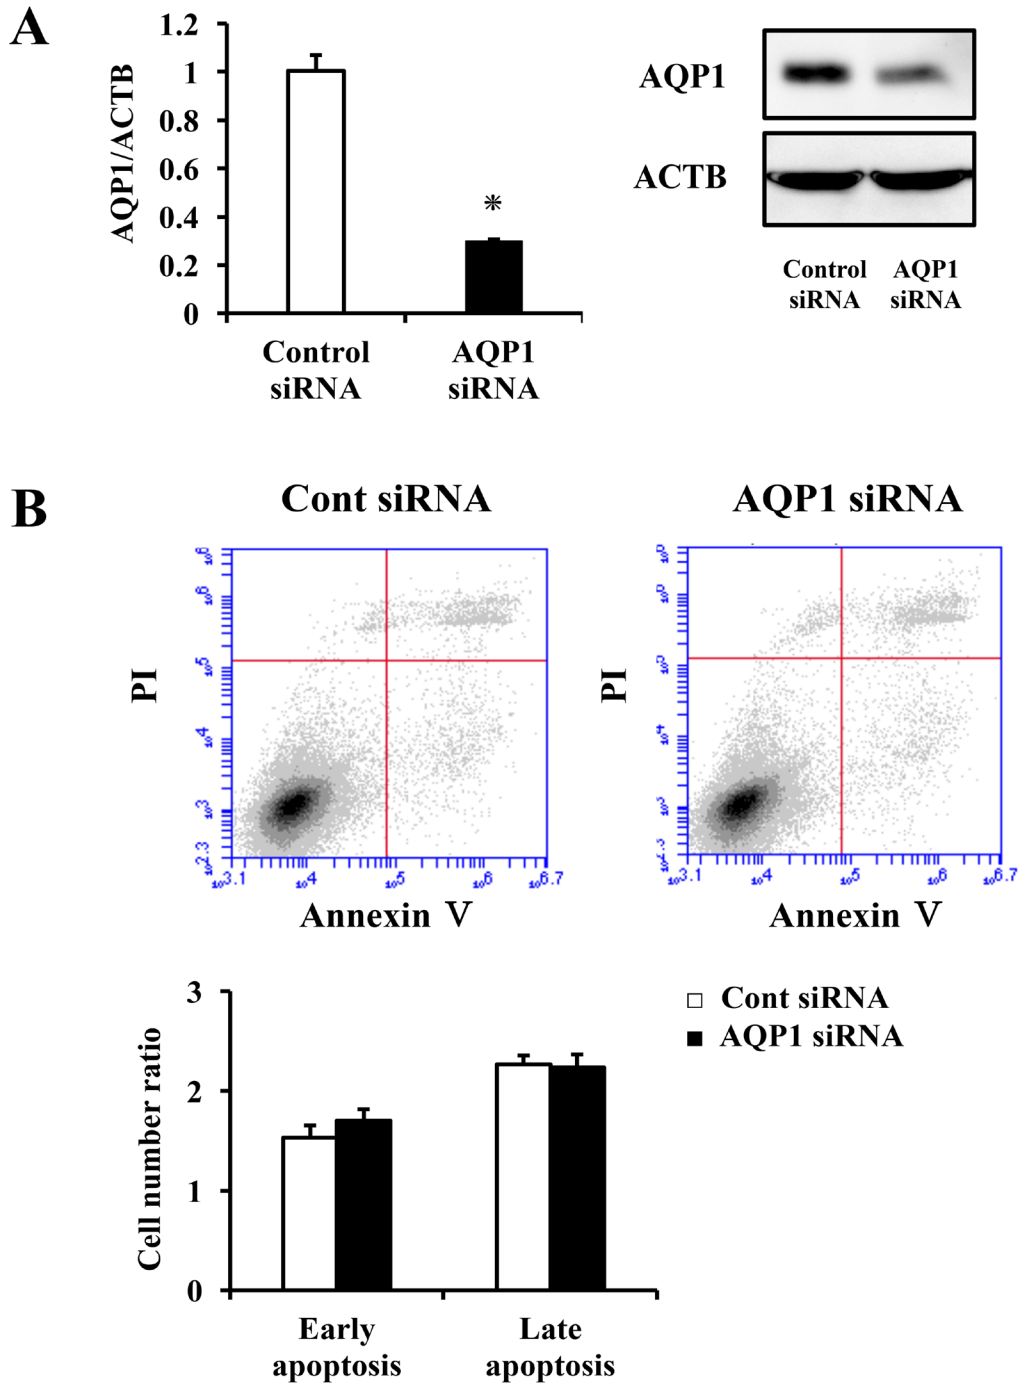

**Supplementary Figure 1: AQP1 has no regulation of the cell survival in KYSE70 cells.** (A) AQP1 siRNA effectively reduced AQP1 mRNA levels in KYSE70 cells. Mean  $\pm$  SEM.  $n = 3$ . \* $p < 0.05$  (significantly different from control siRNA). Western blotting revealed that AQP1 siRNA effectively reduced AQP1 protein levels in KYSE70 cells. (B) AQP1 had no influence on apoptosis in KYSE70 cells. Apoptosis was determined by flow cytometry using PI/Annexin V double staining. Mean  $\pm$  SEM.  $n = 3$ . \* $p < 0.05$  (significantly different from control siRNA).

**A** *Esophageal adenocarcinoma*

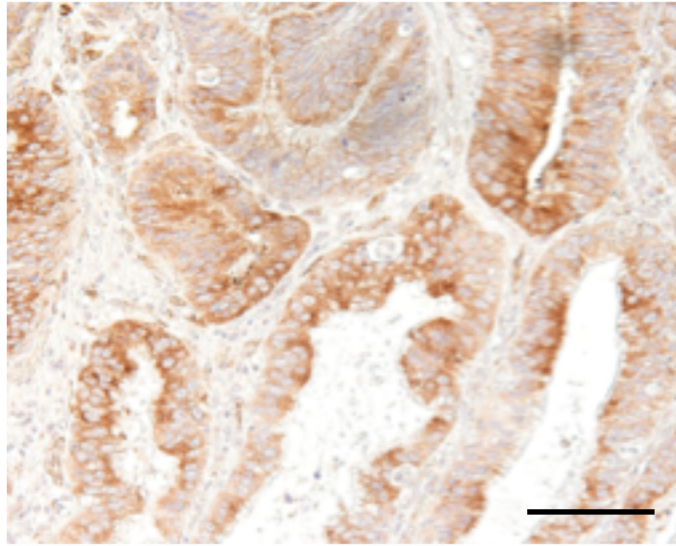

**B** *Esophageal basaloid cell carcinoma*

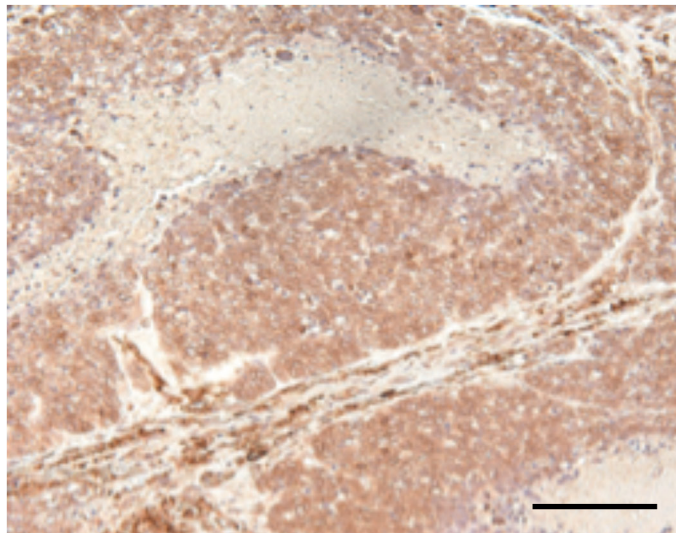

**Supplementary Figure 2: AQP1 protein expression in human esophageal adenocarcinoma and esophageal basaloid-type SCC. (A)** Immunohistochemical staining of human esophageal adenocarcinoma using an anti-AQP1 antibody. AQP1 was expressed in esophageal adenocarcinoma. Magnification:  $\times 200$ . Bar 100  $\mu\text{m}$ . **(B)** Immunohistochemical staining of human esophageal basaloid-type SCC using an anti-AQP1 antibody. AQP1 was expressed in esophageal basaloid-type SCC. Magnification:  $\times 200$ . Bar 100  $\mu\text{m}$ .
